# Supplementary material for: Medical Interventions for Patellofemoral Pain and Patellofemoral Osteoarthritis: A Systematic Review
Source: MDPI journal article supplement (doi:10.3390/jcm9113397), 2020-10-23
Supplement: s1 [file s1]

**Supplementary Table 1.** Individual study population and quality assessment of eligibility criteria (1 indicates quality indicator present, 0 not present).

| First Author<br>Year             | Population                                                                                        | Inclusion items                          |                                              |                                         | Exclusion items      |                           |                                               |                       |                                   |
|----------------------------------|---------------------------------------------------------------------------------------------------|------------------------------------------|----------------------------------------------|-----------------------------------------|----------------------|---------------------------|-----------------------------------------------|-----------------------|-----------------------------------|
| Pharmaceutical & Nutraceutical   |                                                                                                   | Clear definition:<br>symptom<br>location | Clear definition:<br>structural<br>diagnosis | Clear definition:<br>clinical diagnosis | History of<br>trauma | History of<br>dislocation | Evidence of<br>subluxation or<br>malalignment | History of<br>surgery | Other reason for<br>knee symptoms |
| Hart<br>2019 [44]                | PFP/CP (USA)                                                                                      | 0                                        | 0                                            | 1                                       | 0                    | 1                         | 1                                             | 1                     | 1                                 |
| Nakhostin-Roohi<br>2016 [60]     | women athletes<br>with AKP (Iran)                                                                 | 0                                        | 0                                            | 0                                       | 0                    | 0                         | 0                                             | 0                     | 1                                 |
| Örsçelik<br>2015 [47]            | Military with<br>unilateral PFP<br>(Turkey)                                                       | 1                                        | 0                                            | 0                                       | 0                    | 1                         | 1                                             | 0                     | 1                                 |
| Singer<br>2011 [57]              | AKP (Australia)                                                                                   | 1                                        | 0                                            | 1                                       | 0                    | 1                         | 0                                             | 1                     | 1                                 |
| Marti-Bonmati<br>2009 [56]       | degenerative<br>patellar conditions<br>(chondromalacia or<br>OA) not requiring<br>surgery (Spain) | 0                                        | 1                                            | 0                                       | 1                    | 1                         | 0                                             | 0                     | 1                                 |
| Kannus<br>1992 & 1999<br>[58,59] | patients with PFP<br>(Finland)                                                                    | 1<br>As above                            | 0                                            | 1                                       | 0                    | 0                         | 0                                             | 0                     | 1                                 |
| Suter<br>1998 [49]               | AKP, Sports<br>Medicine clinic<br>database (Canada)                                               | 1                                        | 0                                            | 0                                       | 1                    | 1                         | 0                                             | 1                     | 1                                 |
| Raatikainen<br>1990 [48]         | CP patients who<br>attended a Sports<br>Medicine Clinic<br>(Finland)                              | 1                                        | 1                                            | 1                                       | 0                    | 0                         | 0                                             | 0                     | 1                                 |
| Fulkerson<br>1986 [55]           | AKP (USA)                                                                                         | 1                                        | 0                                            | 0                                       | 0                    | 0                         | 0                                             | 0                     | 0                                 |
| Antich<br>1986 [45]              | Physical therapy<br>patients with knee                                                            | 0                                        | 0                                            | 0                                       | 0                    | 0                         | 0                                             | 0                     | 0                                 |

|                              |                                                                                                               |   |   |   |   |   |   |   |   |  |
|------------------------------|---------------------------------------------------------------------------------------------------------------|---|---|---|---|---|---|---|---|--|
|                              | extensor mechanism disorders (USA)                                                                            |   |   |   |   |   |   |   |   |  |
| Bentley 1981 [54]            | CP patients (England)                                                                                         | 1 | 1 | 1 | 0 | 0 | 1 | 0 | 0 |  |
| Matoso 1980 [46]             | CP patients in hospital rheumatology department who had opted for medication instead of surgery (Switzerland) | 0 | 1 | 1 | 0 | 0 | 0 | 0 | 0 |  |
| Darracott 1973 [53]          | PFP in military members attending Army Medical Rehabilitation Unit (England)                                  | 1 | 0 | 1 | 0 | 0 | 0 | 0 | 0 |  |
| <b>Surgical</b>              |                                                                                                               |   |   |   |   |   |   |   |   |  |
| Joseph 2020 [43]             | isolated PFOA (UK)                                                                                            | 0 | 0 | 1 | 0 | 0 | 0 | 1 | 1 |  |
| Odgaard 2018 [40]            | isolated PFOA (Denmark)                                                                                       | 0 | 1 | 0 | 0 | 0 | 1 | 0 | 1 |  |
| Pagenstert 2012 [50]         | patients with lateral patellar hypercompression syndrome (Switzerland)                                        | 1 | 0 | 1 | 0 | 1 | 1 | 0 | 1 |  |
| Kettunen 2007 & 2012 [41,42] | hospital or outpatient clinic, PFP (Finland)                                                                  | 1 | 0 | 1 | 1 | 1 | 0 | 1 | 1 |  |
| Owens 2002 [51]              | recreational women athletes undergoing arthroscopy for isolated patellar                                      | 0 | 1 | 0 | 1 | 1 | 1 | 0 | 1 |  |

|                       |                                                                             |   |   |   |   |   |             |   |   |  |
|-----------------------|-----------------------------------------------------------------------------|---|---|---|---|---|-------------|---|---|--|
|                       | cartilage lesions<br>(USA)                                                  |   |   |   |   |   |             |   |   |  |
| O'Neill<br>1997 [61]  | athletic patients<br>with AKP and<br>lateral patellar<br>tilting (USA)      | 1 | 0 | 1 | 0 | 1 | 1 sub/0 mal | 0 | 1 |  |
| Hejgaard<br>1982 [52] | patients admitted to<br>hospital surgical<br>department for CP<br>(Denmark) | 1 | 1 | 1 | 0 | 0 | 1           | 0 | 1 |  |

AKP = anterior knee pain; PFP = patellofemoral pain; OA = osteoarthritis; CP = chondromalacia patella; PFOA = patellofemoral osteoarthritis; sub = subluxation; mal = malalignment.

Supplementary Table 2. GRADE assessment for pain outcomes

| Intervention                              | Study design | Risk of bias                                             | Inconsistency   | Indirectness                                          | Imprecision                                           | Publication bias       | GRADE certainty |
|-------------------------------------------|--------------|----------------------------------------------------------|-----------------|-------------------------------------------------------|-------------------------------------------------------|------------------------|-----------------|
| <b>Pharmaceutical &amp; Nutraceutical</b> |              |                                                          |                 |                                                       |                                                       |                        |                 |
| <i>Oral</i>                               |              |                                                          |                 |                                                       |                                                       |                        |                 |
| NSAIDS                                    | 4 RCTs       | One moderate RoB [54]<br>Three high RoB [49,55,56]<br>-1 | No<br>0         | No<br>0                                               | CI contains meaningful<br>ES, n<400<br>-1             | Not tested (n<10)<br>0 | <b>Low</b>      |
| Chloroquine                               | 1 RCT        | High RoB [46]<br>-1                                      | One study<br>-1 | Pain outcome<br>unknown<br>validity/reliability<br>-1 | CI not reported,<br>n<400<br>-1                       | Not tested (n<10)<br>0 | <b>Very low</b> |
| Glucosamine                               | 1 RCT        | High RoB [56]<br>-1                                      | One study<br>-1 | No<br>0                                               | CI exceeds meaningful<br>ES, n<400<br>-1              | Not tested (n<10)<br>0 | <b>Very low</b> |
| <b>Pharmaceutical &amp; Nutraceutical</b> |              |                                                          |                 |                                                       |                                                       |                        |                 |
| <i>Injections</i>                         |              |                                                          |                 |                                                       |                                                       |                        |                 |
| Glycosaminoglycan<br>Polysulphate         | 2 RCTs       | Two High RoB [48,58,59]<br>-1                            | Yes<br>-1       | No<br>0                                               | CI contains meaningful<br>ES, n<400<br>-1             | Not tested (n<10)      | <b>Very low</b> |
| Hyaluronic acid                           | 1 RCT        | Low RoB [44]<br>0                                        | One study<br>-1 | No<br>0                                               | CI contains meaningful<br>ES; <400 participants<br>-1 | Not tested (n<10)      | <b>Low</b>      |
| Platelet-rich plasma                      | 1 RCT        | High RoB [47]<br>-1                                      | One study<br>-1 | Military; Dose is<br>comparator<br>-1                 | CI spans meaningful<br>ES, n<400<br>-1                | Not tested (n<10)<br>0 | <b>Very low</b> |
| Botox                                     | 1 RCT        | Moderate RoB [57]<br>0                                   | One study<br>-1 | No<br>0                                               | CI contains meaningful<br>ES, n<400<br>-1             | Not tested (n<10)<br>0 | <b>Low</b>      |
| Anabolic steroids                         | 1 RCT        | High RoB [53]<br>-1                                      | One study<br>-1 | Military only, 93%<br>men<br>-1                       | CI exceeds meaningful<br>ES, n<400<br>-1              | Not tested (n<10)<br>0 | <b>Very low</b> |

|                                                               |       |                                              |                                                                                       |                                                                                     |                                           |                        |                 |
|---------------------------------------------------------------|-------|----------------------------------------------|---------------------------------------------------------------------------------------|-------------------------------------------------------------------------------------|-------------------------------------------|------------------------|-----------------|
| <b>Pharmaceutical &amp; Nutraceutical</b>                     |       |                                              |                                                                                       |                                                                                     |                                           |                        |                 |
| <i>Transdermal</i>                                            |       |                                              |                                                                                       |                                                                                     |                                           |                        |                 |
| <b>NSAIDs<br/>(phonophoresis)</b>                             | 1 RCT | Moderate RoB [60]<br>0                       | One study<br>-1                                                                       | Women athletes<br>only<br>-1                                                        | Values not reported,<br>n<400<br>-1       | Not tested (n<10)<br>0 | <b>Very low</b> |
| <b>Corticosteroids<br/>(iontophoresis,<br/>phonophoresis)</b> | 1 RCT | High RoB [45]<br>-1                          | One study<br>-1                                                                       | Vague diagnosis,<br>sex not reported<br>-1                                          | CI spans meaningful<br>ES, n<400<br>-1    | Not tested (n<10)<br>0 | <b>Very low</b> |
| <b>Surgical</b>                                               |       |                                              |                                                                                       |                                                                                     |                                           |                        |                 |
| <i>Arthroscopic</i>                                           |       |                                              |                                                                                       |                                                                                     |                                           |                        |                 |
| <b>Standard<br/>arthroscopy</b>                               | 1 RCT | High RoB [41,42]<br>-1                       | One study<br>-1                                                                       | No<br>0                                                                             | CI spans meaningful<br>ES, n<400<br>-1    | Not tested (n<10)<br>0 | <b>Very low</b> |
| <b>Radiofrequency<br/>debridement</b>                         | 1 RCT | High RoB [51]<br>-1                          | One study<br>-1                                                                       | Women only,<br>isolated PF<br>cartilage lesions<br>-1                               | CI exceeds meaningful<br>ES, n<400<br>-1  | Not tested (n<10)<br>0 | <b>Very low</b> |
| <b>Surgical</b>                                               |       |                                              |                                                                                       |                                                                                     |                                           |                        |                 |
| <i>Open surgeries</i>                                         |       |                                              |                                                                                       |                                                                                     |                                           |                        |                 |
| <b>Lateral retinacular<br/>surgery</b>                        | 2 RCT | Two high RoB [50,61]<br>-1                   | No<br>0                                                                               | Diagnosis specific<br>to lateral patellar<br>alignment or<br>hypercompression<br>-1 | CI contains meaningful<br>ES, n<400<br>-1 | Not tested (n<10)<br>0 | <b>Very low</b> |
| <b>Anterior tibial<br/>tuberosity<br/>displacement</b>        | 1 RCT | High RoB [52]<br>-1                          | One study<br>-1                                                                       | CP surgical<br>candidates<br>0                                                      | CI exceeds meaningful<br>ES, n<400<br>-1  | Not tested (n<10)<br>0 | <b>Very low</b> |
| <b>Patellofemoral<br/>arthroplasty</b>                        | 2 RCT | One low RoB[40]<br>One moderate RoB[43]<br>0 | Effects in<br>different<br>directions but<br>not significant<br>so results<br>similar | Isolated PFOA<br>0                                                                  | CI spans meaningful<br>ES, n<400<br>-1    | Not tested (n<10)<br>0 | <b>Moderate</b> |

RoB = risk of bias; RCT = randomized controlled trial; ES = effect size; PFOA = patellofemoral osteoarthritis; CI = confidence intervals

**Decision guidelines for scoring:** RoB: -1 for high RoB (low and moderate no reduction); Inconsistency: -1 if results differ among studies regarding significance or direction of effect; or if not enough evidence to assess (e.g. only 1 study); Indirectness: -1 if population characteristics limit generalizability; if comparator has unknown efficacy or if pain outcome is not a validated measure; Imprecision: -1 if sample size <400, or if confidence intervals are wide and either contain clinically meaningful benefit (meaningful defined as SMD 0.5 or RR 25%), or span both clinically meaningful benefit and harm. Note if large ES (i.e. CI exceeds clinically meaningful difference), we only upgraded if study was also rated low RoB); Publication bias: only assess if at least 10 studies for every treatment comparison.
